# Supplementary material
Source: publisher figshare collection journal article supplement (https://frontiersin.figshare.com/ndownloader/files/15669791)
Supplement: Supplementary file 1 [file 15669791]

## Supplementary Material:

# Variation of the BrO/SO<sub>2</sub> molar ratio in the plume of Tungurahua volcano between 2007 and 2017 and its relationship to volcanic activity

## 1 SUPPLEMENTARY TABLES AND FIGURES

The supplementary data comprises of a collection of the dataset of the BrO/SO<sub>2</sub> ratio as well as the co-added SO<sub>2</sub> and BrO SCDs for the 11 phases discussed in the manuscript.

### 1.1 Figures

Each figure comprises of the BrO/SO<sub>2</sub> ratio calculated with 2 methods and for different periods (daily and longer periods, top), the SO<sub>2</sub> SCDs (blue, middle) as well as the BrO SCDs (red, bottom). For shorter phases several phases are put together in one plot.

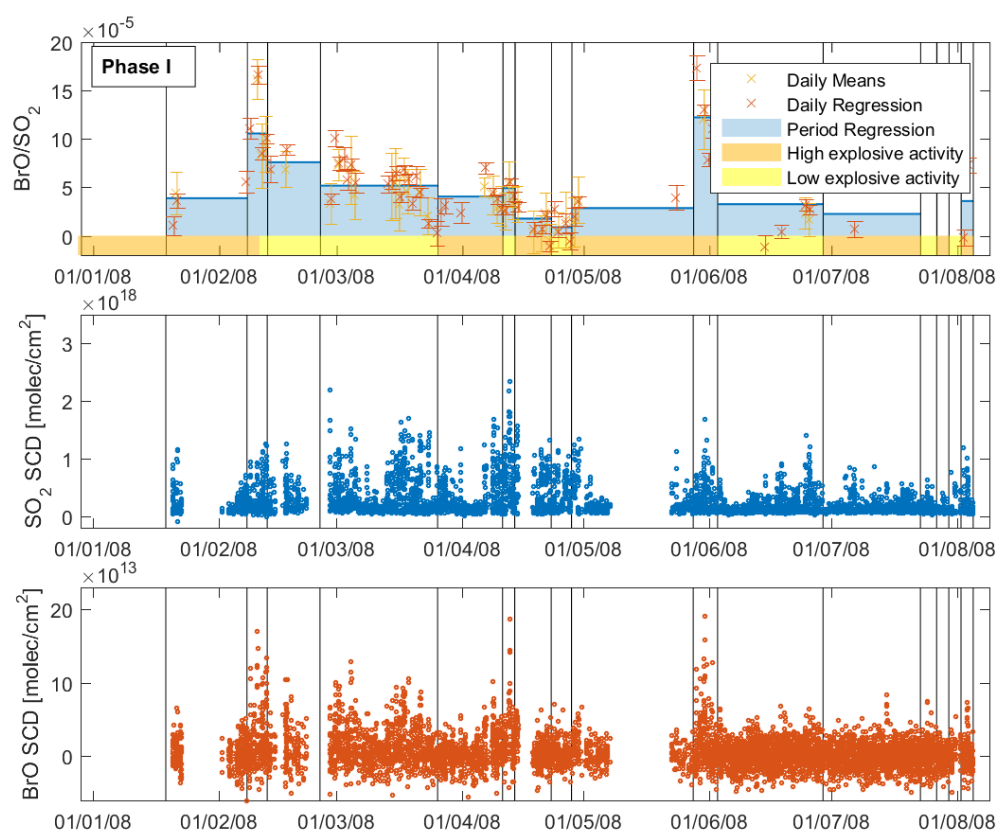

**Figure S1.** NOVAC data observed during eruptive phase I. **top:** The molar BrO/SO<sub>2</sub> ratio calculated by a regression for each of the parts (blue, parts indicated by vertical lines), daily regression (red) and daily means method (yellow). Activity classification is indicated with orange (HEA) and yellow (LEA). **middle:** Multi-add SO<sub>2</sub> slant column densities (SCD, blue) and **bottom:** BrO slant column density (red).

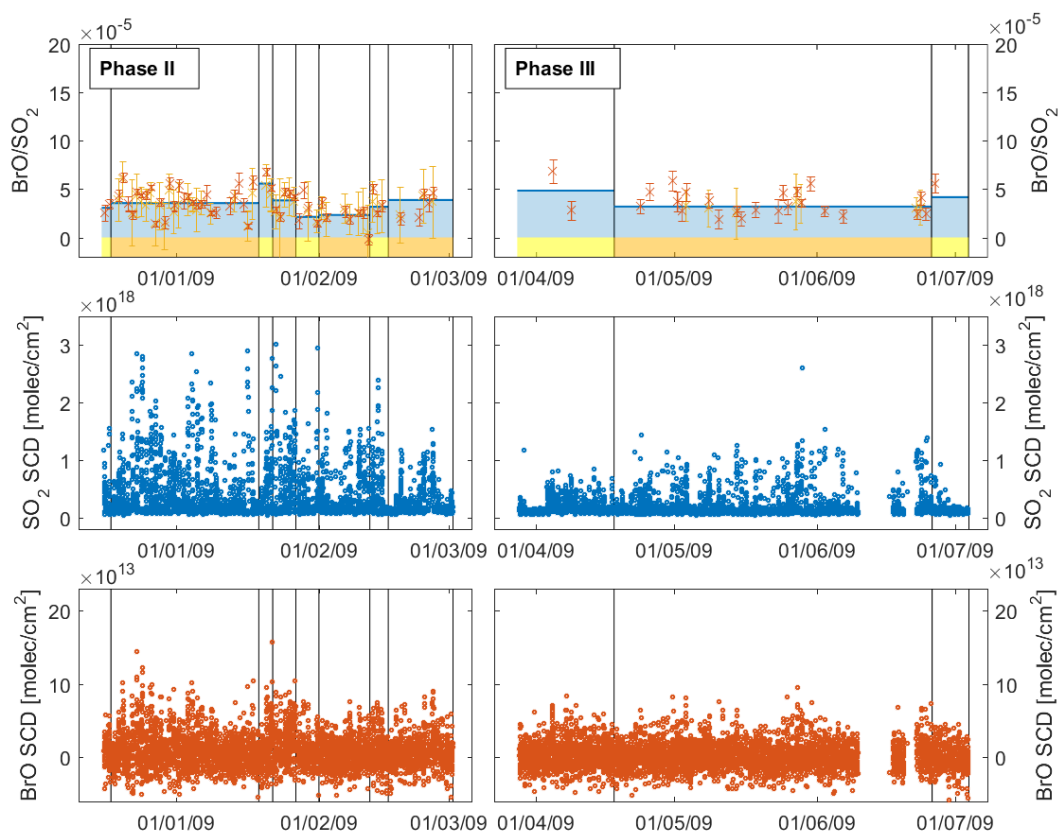

**Figure S2.** NOVA data observed during eruptive phase II and III. **top:** The molar BrO/SO<sub>2</sub> ratio calculated by a regression for each of the parts (blue, parts indicated by vertical lines), daily regression (red) and daily means method (yellow). Activity classification is indicated with orange (HEA) and yellow (LEA). **middle:** Multi-add SO<sub>2</sub> slant column densities (SCD, blue) and **bottom:** BrO slant column density (red).

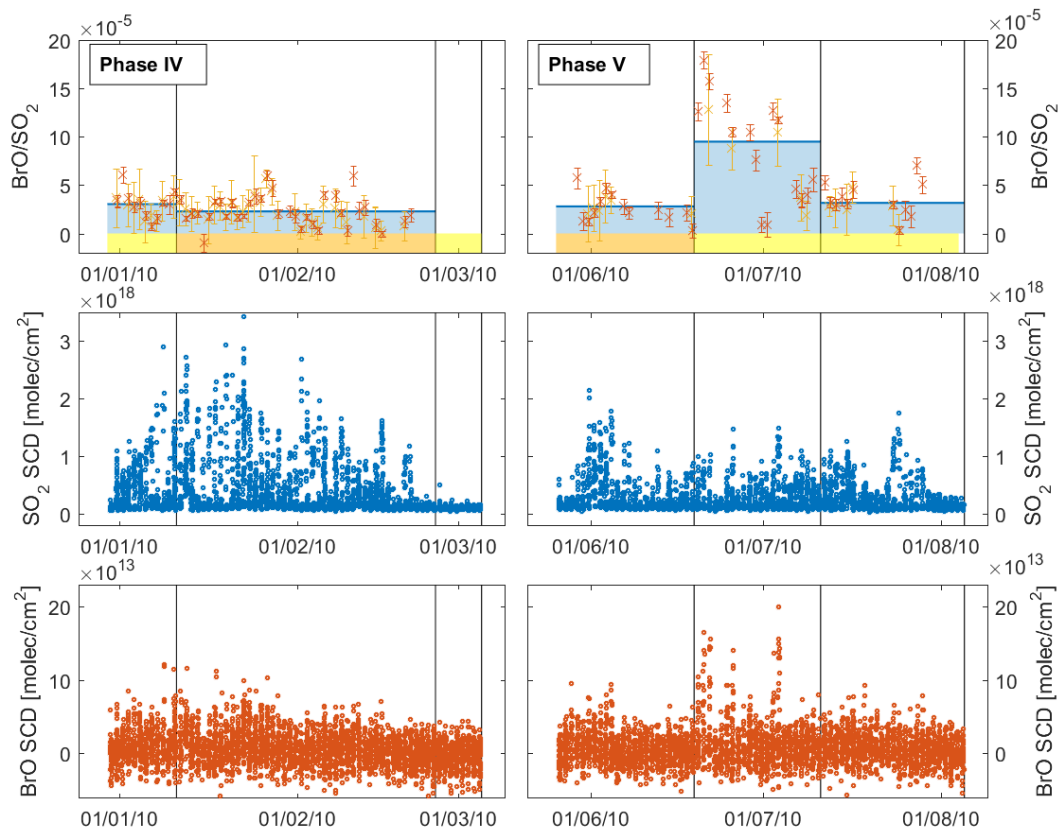

**Figure S3.** NOVA data observed during eruptive phase IV and V. **top:** The molar  $\text{BrO}/\text{SO}_2$  ratio calculated by a regression for each of the parts (blue, parts indicated by vertical lines), daily regression (red) and daily means method (yellow). Activity classification is indicated with orange (HEA) and yellow (LEA). **middle:** Multi-add  $\text{SO}_2$  slant column densities (SCD, blue) and **bottom:** BrO slant column density (red).

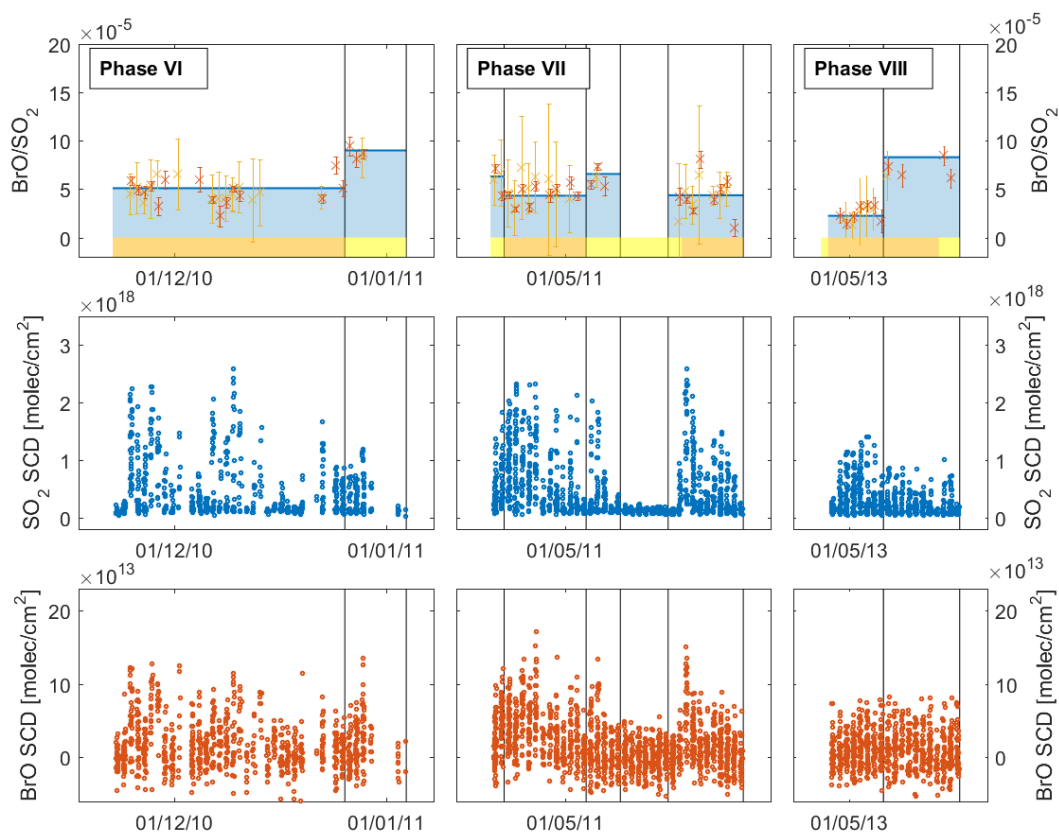

**Figure S4.** NOVA data observed during eruptive phase VI, VII, and VIII. **top:** The molar  $\text{BrO}/\text{SO}_2$  ratio calculated by a regression for each of the parts (blue, parts indicated by vertical lines), daily regression (red) and daily means method (yellow). Activity classification is indicated with orange (HEA) and yellow (LEA). **middle:** Multi-add  $\text{SO}_2$  slant column densities (SCD, blue) and **bottom:** BrO slant column density (red).

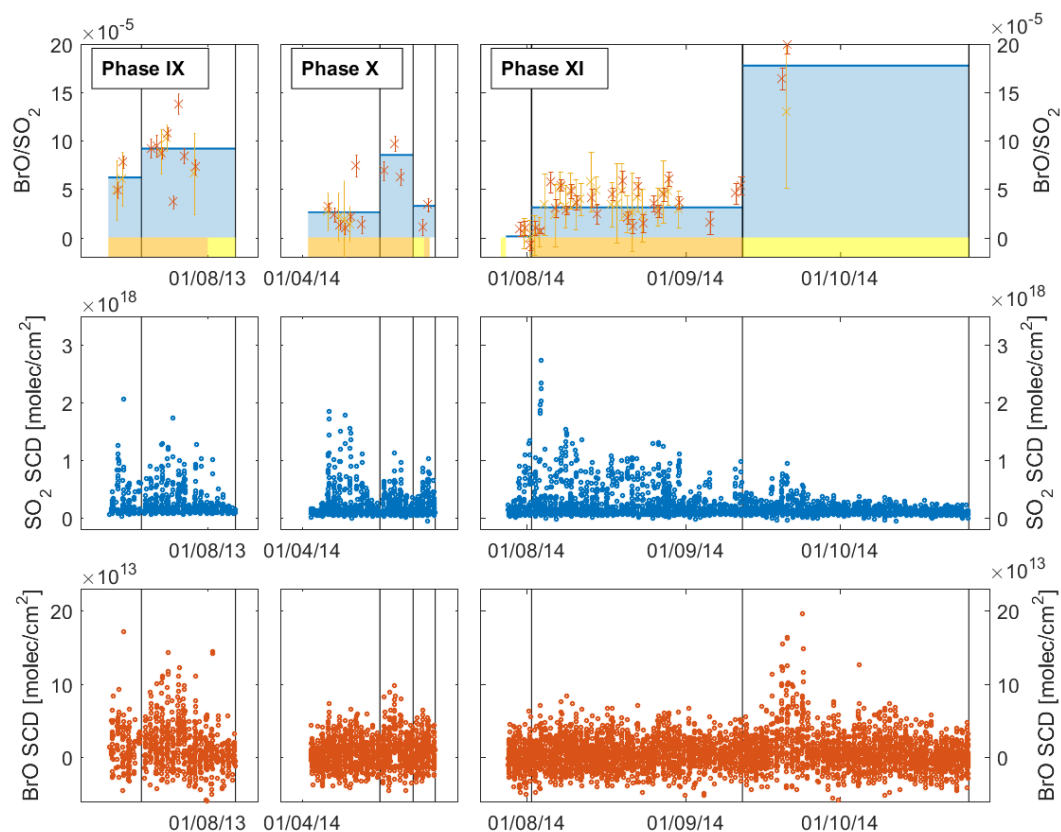

**Figure S5.** NOVA data observed during eruptive phase IX, X, and XI. **top:** The molar  $\text{BrO}/\text{SO}_2$  ratio calculated by a regression for each of the parts (blue, parts indicated by vertical lines), daily regression (red) and daily means method (yellow). Activity classification is indicated with orange (HEA) and yellow (LEA). **middle:** Multi-add  $\text{SO}_2$  slant column densities (SCD, blue) and **bottom:** BrO slant column density (red).
